RESEARCH ARTICLE

# Minimal change disease following COVID-19 vaccination: A systematic review

Konstantinos S. Kechagias<sup>1\*</sup>, Joshua D. Laleye<sup>1</sup>, Jan Drmota<sup>1</sup>, Georgios Geropoulos<sup>2</sup>, Georgios Kyrtsonis<sup>1</sup>, Marina Zafeiri<sup>3</sup>, Konstantinos Katsikas Triantafyllidis<sup>4</sup>, Dimitra Stathi<sup>5</sup>

**1** Department of Metabolism, Digestion and Reproduction, Faculty of Medicine, Imperial College London, London, United Kingdom, **2** Western General Hospital, Lothian NHS, Edinburgh, United Kingdom, **3** School of Cardiovascular Medicine and Sciences, King's College London, London, United Kingdom, **4** Department of Nutrition and Dietetics, Royal Marsden NHS Foundation Trust, London, United Kingdom, **5** Department of Endocrinology and Diabetes, King's College Hospital NHS Foundation Trust, London, United Kingdom

\* [konstantinos.kechagias18@imperial.ac.uk](mailto:konstantinos.kechagias18@imperial.ac.uk)

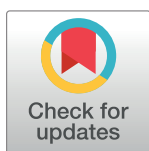

## Abstract

### Background

The newly developed COVID-19 vaccines are highly effective and safe. However, a small portion of vaccine recipients experience a wide range of adverse events. Recently, glomerular disease, including the development of Minimal Change Disease (MCD), has been observed after administration of different COVID-19 vaccines, although causality remains a matter of debate.

### Aim

The aim of this systematic review was to comprehensively examine the available literature and provide an overview of reported cases of MCD following vaccination against SARS-CoV-2.

### Results

We identified 46 eligible articles which included 94 cases with MCD following COVID-19 vaccination of which one case was reported twice due to a second relapse. Fifty-five participants were males (59.1%, 55/93) and 38 (40.9%, 38/93) were females with a mean age of 45.02 years (SD:20.95). From the included patients 50 (50/94, 53.1%) were described as new-onset and 44 (46.9%, 44/94) as relapse. On average, symptomatology developed 16.68 days (SD: 22.85) after the administration of the vaccine irrespective of the dose. Data about symptoms was reported in 68 cases with the most common being oedema (80.8%, 55/68), followed by weight gain (26.5%, 18/68) and hypertension (16.1%, 11/68). In terms of outcome, more than half of the patients went into remission (61%, 57/94), while 18 recovered or improved post treatment (19.1%, 18/94). Two people relapsed after treatment (2.1%, 2/94) and two cases (2.1%, 2/94) were reported as not recovered.

## OPEN ACCESS

**Citation:** Kechagias KS, Laleye JD, Drmota J, Geropoulos G, Kyrtsonis G, Zafeiri M, et al. (2024) Minimal change disease following COVID-19 vaccination: A systematic review. PLoS ONE 19(3): e0297568. <https://doi.org/10.1371/journal.pone.0297568>

**Editor:** Rajendra Bhimma, University of KwaZulu-Natal, SOUTH AFRICA

**Received:** May 12, 2023

**Accepted:** January 4, 2024

**Published:** March 5, 2024

**Peer Review History:** PLOS recognizes the benefits of transparency in the peer review process; therefore, we enable the publication of all of the content of peer review and author responses alongside final, published articles. The editorial history of this article is available here: <https://doi.org/10.1371/journal.pone.0297568>

**Copyright:** © 2024 Kechagias et al. This is an open access article distributed under the terms of the [Creative Commons Attribution License](https://creativecommons.org/licenses/by/4.0/), which permits unrestricted use, distribution, and reproduction in any medium, provided the original author and source are credited.

**Data Availability Statement:** All relevant data are within the manuscript and its [Supporting Information](#) files.

**Funding:** The authors received no specific funding for this work.

**Competing interests:** The authors have declared that no competing interests exist.

## Conclusion

MCD is possibly a condition clinicians may see in patients receiving COVID-19 vaccines. Although this adverse event is uncommon, considering the limited published data and the absence of confirmed causality, increased clinical awareness is crucial for the early recognition and optimal management of these patients.

## Introduction

In late 2019, a global pandemic, which created extraordinary socio-economic consequences, emerged due to an outbreak of an uncommon viral pneumonia [1–3]. The aetiological factor was later identified as a previously unknown strain of coronavirus named Severe Acute Respiratory Syndrome Coronavirus 2 (SARS-CoV-2), responsible for the onset of coronavirus disease 2019 (COVID-19). The disease has since spread extensively, impacting hundreds of millions of individuals across the globe [4, 5].

Various vaccines have been utilised successfully against SARS-CoV-2 such as COMIR-NATY (BioNTech-Pfizer's COVID-19 mRNA vaccine BNT162b2), COVID-19 Vaccine Moderna (Moderna's mRNA vaccine-1273), VAXZEVRIA (AstraZeneca-Oxford University's ChAdOx1-nCoV19), COVID-19 Vaccine Janssen (Janssen's Ad26.COVS.2.S) and CoronaVac COVID19 vaccine (Sinovac Biotech's Vero cell) [6, 7]. Currently, nearly two-thirds of the global population have received at least one dose of a COVID-19 vaccine, with more than 13 billion doses administered worldwide [8].

A plethora of published studies have demonstrated the safety and effectiveness of the aforementioned vaccines, with only infrequent adverse events reported in the literature [9–12]. Nonetheless, isolated adverse reactions after COVID-19 vaccine administration are unavoidable, given the vast amount of vaccination doses needed to curb the spread of COVID-19 [13, 14]. At present, patients commonly experience various reported adverse symptoms, such as muscle pain, fever, headache, nausea, and vomiting. In addition to the frequently observed adverse effects following COVID-19 vaccination, patients have also reported a wide range of complaints and symptoms, including immune-mediated adverse events [13, 15–18].

Recently, there is a growing number of reports regarding the development of Minimal Change Disease (MCD) in patients following their initial or second COVID-19 vaccine doses; However, these cases have not yet undergone thorough investigation, and the administration of COVID-19 vaccines has not been recognised as a causative factor for renal dysfunction. To address this gap, our study systematically analysed the existing literature to present a comprehensive summary of documented cases of MCD following SARS-CoV-2 vaccination.

## Methods

This review was reported based on the “Preferred Reporting Items for Systematic Reviews and Meta-Analyses” (PRISMA) guidelines (S1 Fig).

## Literature search

Two reviewers (KSK, JDL) searched PubMed and Scopus library databases from inception until January 2023 independently. The search included the following terms: “(COVID 19 vaccin\* OR SARS-COV2 vaccin\*) AND (minimal change disease OR glomerulonephritis OR nephrotic OR nephritic)”. There were no limitations placed regarding study design,

geographic region, or language. Additionally, a manual search of references cited in the included articles and relevant published reviews was conducted to identify any missed studies. Discrepancies during the literature search were resolved by a third investigator (DS).

### Eligibility criteria

We included studies that provided data for new onset or relapse of MCD following COVID-19 vaccination with at least one dose. All study designs were considered eligible for inclusion. Review articles, abstracts submitted in conferences and non-peer reviewed sources were not eligible for inclusion. Studies on in vitro and animal models were excluded.

### Data extraction and handling

In all studies, patient data was retrieved and handled by two authors (JDL, JD) who conducted the data extraction independently. We collected the following information: sex, age, comorbidities, vaccine type, number of doses received, presenting complaints and symptoms, history of previous COVID-19 infection, laboratory tests including antibodies, primary diagnosis, imaging findings, therapeutic management and clinical outcome. Any disagreements were discussed and resolved by a third author (KSK).

### Quality assessment

The quality of the included studies was assessed using the criteria established by the Task Force for Reporting Adverse Events of the International Society for Pharmacoepidemiology (ISPE) and the International Society of Pharmacovigilance (ISoP) [19]. The evaluation was based on the satisfactory reporting of 12 different elements, including the title, patient demographics, current health status, medical history, physical examination, patient disposition, drug identification, dosage, administration/drug reaction interface, concomitant therapies, adverse events, and discussion. Each element was assigned a score of either 0 (lack of information) or 1 (information present) for the studies.

## Results

### Study characteristics

The initial literature search yielded 830 publications. In the first screening 777 studies were excluded as irrelevant. Forty-six studies [20–65] were found to be eligible for the systematic review based on the predefined inclusion criteria (Fig 1). Twenty of the studies were conducted in Asia, 16 in Europe, 9 in Americas, and 1 in Australia. Seven studies were case series and 39 were case reports (Table 1).

We identified a total of 94 cases of MCD following COVID-19 vaccination, of which one case was reported twice after relapsing following the second dose.

Fifty-five participants were males (59.1%, 55/93) and 38 (40.9%, 38/93) were females with a mean age of 45.02 years (SD:20.95). From the included patients 50 (50/94, 53.1%) were characterised as new-onset and 44 (46.9%, 44/94) as relapse. The mean age of individuals with MCD relapse was 41.6 (SD:20). For most of the patients (79.5%, 74/93) data regarding COVID-19 infection before or at the time of diagnosis was not provided. Among the remaining patients only 2 were previously infected with SARS-CoV-2. In 2 cases, vaccine brand was not reported (2.1%, 2/94). The majority of the patients received COMIRNATY (58.5%, 55/94), followed by COVID-19 Vaccine Moderna (20.2%, 19/94) and VAXZEVRIA (14%, 13/94), while 4 participants received COVID-19 Vaccine Janssen (3.2%, 3/94) and CoronaVac (1%, 1/94). In one case vaccine type was reported as modRNA (1%, 1/94). The majority of patients developed

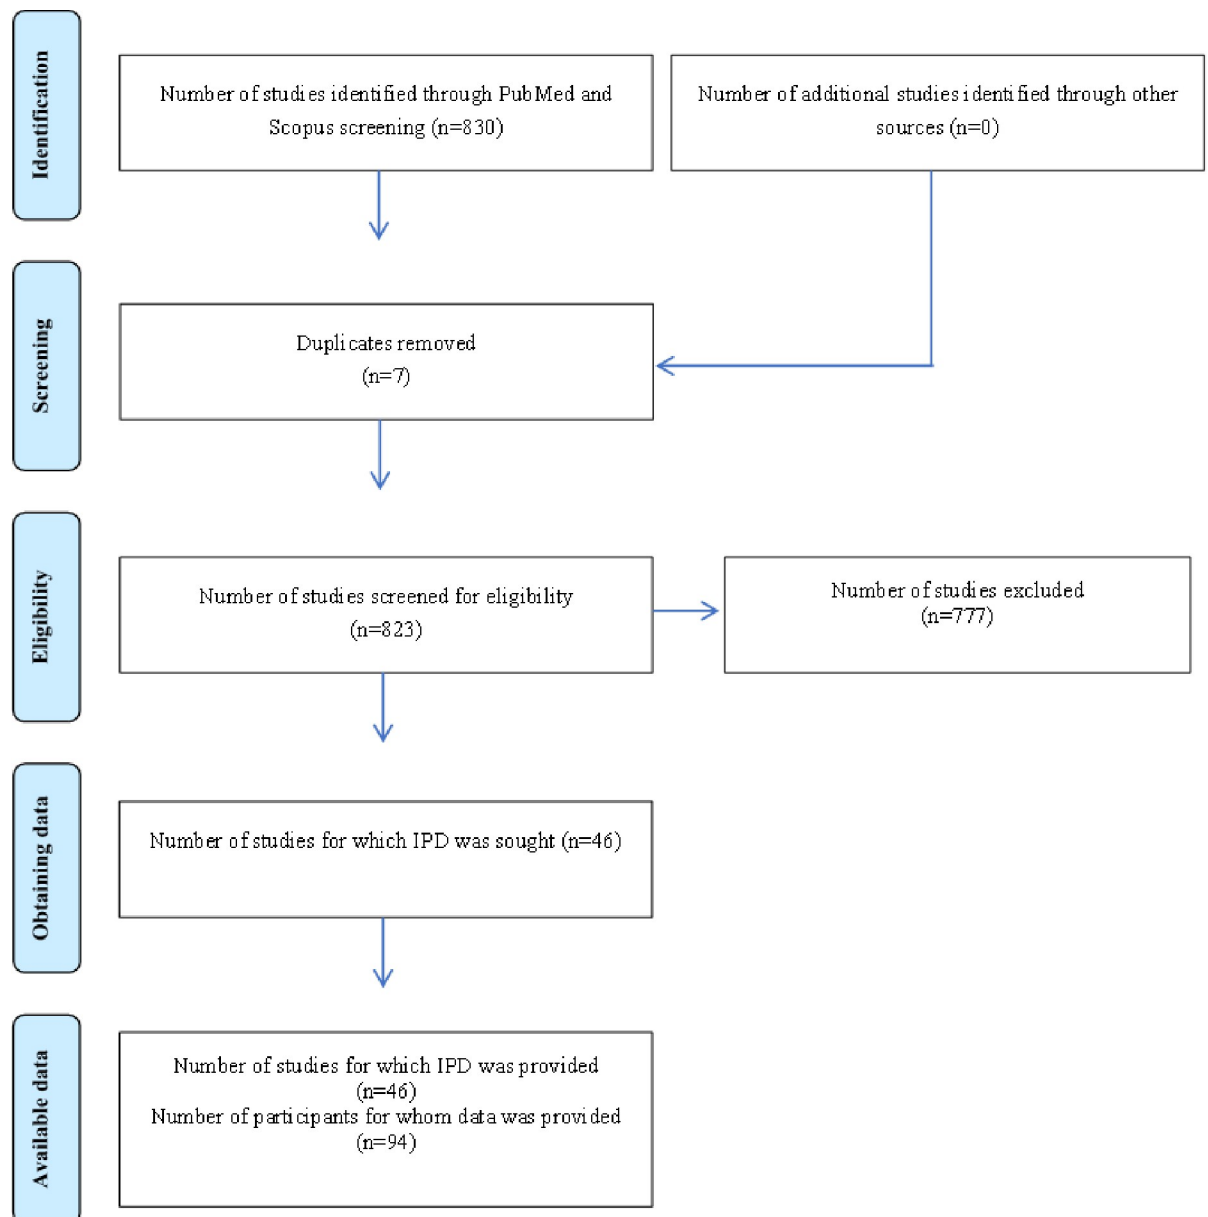

**Fig 1. PRISMA flowchart.** IPD: individual patient data.

<https://doi.org/10.1371/journal.pone.0297568.g001>

symptoms after the first dose (55.5%, 52/94), followed by the second dose (39.3%, 37/94), third dose (2.2%, 2/94), booster (1%, 1/94), both first and second doses (1%, 1/94), while in one case relevant data was not provided (1%, 1/94).

On average, the symptoms developed 16.68 days (SD: 22.85) after the administration of the vaccine irrespective of the dose. Data about symptomatology was reported in 68 individuals with the most common symptom being oedema (80.8%, 55/68), weight gain (26.5%, 18/68) and hypertension (16.1%, 11/68). MCD was confirmed with biopsy in 76 cases (80.8%, 76/94). Sixteen cases (17%, 16/94) were relapses and biopsy was not repeated. In two cases (2.1%), diagnosis was based on clinical suspicion (S1 Table). The majority of patients received steroids (91.5%, 86/94), while some patients were treated with immunosuppressive agents (22.3%, 21/94) and diuretics (17%, 16/94). More than half went to remission (61%, 57/94), while 18

Table 1. Characteristics of the included studies.

| Author, Year, Country        | Case number, Age, Gender | Comorbidities                                   | Previous glomerulopathy | Previous COVID-19 infection | COVID-19 vaccine type and dose           | New onset/ relapse of minimal change disease post vaccination | Main presenting symptoms                                                                                                                           | Days for the onset of symptoms              | Treatment                                                                  | Outcome                                        |
|------------------------------|--------------------------|-------------------------------------------------|-------------------------|-----------------------------|------------------------------------------|---------------------------------------------------------------|----------------------------------------------------------------------------------------------------------------------------------------------------|---------------------------------------------|----------------------------------------------------------------------------|------------------------------------------------|
| Marampudi 2022 USA           | case 1<br>54 F           | Hypertension                                    | MCD                     | none                        | mRNA (Pfizer), first                     | relapse                                                       | <ul style="list-style-type: none"> <li>Lower Limb Oedema</li> <li>Foamy Urine</li> </ul>                                                           | 7                                           | Prednisolone (50mg/day)                                                    | prednisone taper rituximab if relapses         |
| Pella 2022 Greece            | case 1<br>18 M           | None                                            | None                    | none                        | mRNA (Pfizer), first                     | new                                                           | <ul style="list-style-type: none"> <li>Nausea</li> <li>Bloating</li> <li>Abdominal Pain</li> <li>Lower Limb Oedema</li> <li>Weight Gain</li> </ul> | 11                                          | Irbesartan 150 mg<br>Methylprednisolone 48 mg                              | Complete remission in 6 weeks                  |
| Alhosaini 2022 UAE           | case 1<br>16 M           | None                                            | n/a                     | NA                          | mRNA (Pfizer), second                    | new                                                           | <ul style="list-style-type: none"> <li>Lower Limb Oedema</li> <li>Ankle Swelling</li> <li>Abdominal Pain</li> <li>Weight gain</li> </ul>           | 7                                           | Prednisone 60mg, furosemide, Olmesartan                                    | Oedema resolved after 1 week                   |
| Mochizuki 2022 Japan         | case 1<br>25 F           | None                                            | None                    | NA                          | mRNA (Moderna), first                    | new                                                           | <ul style="list-style-type: none"> <li>Facial Oedema</li> <li>Peripheral oedema</li> <li>Weight gain</li> </ul>                                    | 26                                          | IV Methylprednisolone 500 mg/day for 3 days<br>Oral Prednisolone 45mg/day. | Complete remission by day 10                   |
| Park 2022 Korea              | case 1<br>34 M           | NA                                              | None                    | NA                          | mRNA (Moderna), second                   | new                                                           | <ul style="list-style-type: none"> <li>Peri-ocular oedema</li> <li>Dyspnoea</li> <li>Weight gain</li> </ul>                                        | 3                                           | Prednisolone                                                               | Remission after 11 weeks                       |
|                              | case 2<br>60 M           | NA                                              | None                    | NA                          | mRNA (Moderna), second                   | new                                                           | <ul style="list-style-type: none"> <li>Oedema</li> <li>Weight gain</li> </ul>                                                                      | 5                                           | Steroids                                                                   | Complete remission after 2 weeks               |
| Hartley 2022 UK              | case 1<br>80s F          | None                                            | None                    | NA                          | mRNA (Pfizer), first                     | new                                                           | <ul style="list-style-type: none"> <li>Oedema</li> <li>Reduced urine output</li> <li>Hypertension</li> </ul>                                       | 2                                           | Loop diuretics, Low molecular weight heparin, Steroids, Levothyroxine      | Complete remission                             |
|                              | case 2<br>40s M          | Wolf-Parkinson-White Syndrome, Cardiac ablation | MCD                     | NA                          | mRNA (Pfizer), first                     | relapse                                                       | <ul style="list-style-type: none"> <li>Oedema</li> <li>Diarrhoea</li> <li>Vomiting</li> </ul>                                                      | 1                                           | Furosemide, Prednisolone, Ciclosporin                                      | Complete remission                             |
| Leong 2021 Singapore         | case 1<br>42 F           | None                                            | MCD                     | NA                          | mRNA (Moderna), second                   | relapse                                                       | <ul style="list-style-type: none"> <li>Oedema</li> <li>Frothy urine</li> </ul>                                                                     | 11                                          | Prednisolone                                                               | Remission within 2 weeks                       |
|                              | case 2<br>30 M           | None                                            | MCD                     | NA                          | mRNA (Pfizer), second                    | relapse                                                       | <ul style="list-style-type: none"> <li>Oedema</li> <li>Frothy urine</li> </ul>                                                                     | 7                                           | Prednisolone                                                               | Remission within 2 weeks                       |
| Tanaka 2022 Japan            | case 1<br>69 F           | Hypertension, Hyperlipidaemia                   | None                    | NA                          | mRNA (Pfizer), second                    | new                                                           | <ul style="list-style-type: none"> <li>Oedema</li> <li>Weight gain</li> </ul>                                                                      | 9–18 days                                   | Prednisolone                                                               | Complete remission within 1 month              |
| Jongvilaikasem 2022 Thailand | case 1<br>14 M           | None                                            | None                    | NA                          | mRNA (Pfizer), first                     | new                                                           | <ul style="list-style-type: none"> <li>Oedema</li> <li>Hypertension</li> </ul>                                                                     | 5                                           | Corticosteroids                                                            | Partial remission after 5 weeks treatment      |
| Marinaki 2021 Greece         | case 1<br>55 F           | Hypothyroidism                                  | None                    | NA                          | mRNA (Pfizer), first and second          | mode (after second dose)                                      | <ul style="list-style-type: none"> <li>Oedema</li> <li>Weight gain</li> </ul>                                                                      | 4 days after first dose. 1 day after second | Prednisolone                                                               | Remission after 10 days                        |
| Biradar 2021 India           | case 1<br>22 M           | None                                            | None                    | NA                          | Viral Vector (Oxford-Astrazeneca), first | new                                                           | <ul style="list-style-type: none"> <li>Oedema</li> </ul>                                                                                           | 11                                          | Prednisolone                                                               | Remission after 1 week                         |
| Unver 2021 Turkey            | case 1<br>67 F           | Type 2 diabetes mellitus                        | None                    | NA                          | Inactivated (Sinovac), first             | new                                                           | <ul style="list-style-type: none"> <li>Oedema</li> <li>Weight gain</li> </ul>                                                                      | 20                                          | Ramipril, Valsartan, Nebivolol, Rosuvastatin, Furosemide                   | Represented after second dose                  |
| Lebedev 2021 Israel          | case 1<br>50 M           | None                                            | None                    | NA                          | mRNA (Pfizer), first                     | new                                                           | <ul style="list-style-type: none"> <li>Oedema</li> <li>Abdominal distension</li> </ul>                                                             | 4 days                                      | Prednisolone                                                               | Improved 17 days later                         |
| Hanna 2021 Canada            | case 1<br>60 M           | None                                            | None                    | NA                          | mRNA (Pfizer), first                     | new                                                           | <ul style="list-style-type: none"> <li>Oedema</li> <li>Fatigue</li> <li>Shortness of breath on exertion</li> </ul>                                 | 10                                          | Ramipril, Furosemide, Prednisolone                                         | Remission from 14 days confirmed 3 weeks later |

(Continued)

Table 1. (Continued)

| Author, Year, Country      | Case number, Age, Gender | Comorbidities                                                                                                                    | Previous glomerulopathy | Previous COVID-19 infection | COVID-19 vaccine type and dose            | New onset/relapse of minimal change disease post vaccination | Main presenting symptoms                                                   | Days for the onset of symptoms | Treatment                                                                                 | Outcome                                                                                       |
|----------------------------|--------------------------|----------------------------------------------------------------------------------------------------------------------------------|-------------------------|-----------------------------|-------------------------------------------|--------------------------------------------------------------|----------------------------------------------------------------------------|--------------------------------|-------------------------------------------------------------------------------------------|-----------------------------------------------------------------------------------------------|
| Baskaran 2022<br>Australia | case 1<br>31 F           | NA                                                                                                                               | None                    | NA                          | mRNA (Pfizer), second                     | new                                                          | • Oedema                                                                   | 21                             | High-dose steroids                                                                        | Good response to treatment                                                                    |
|                            | case 2<br>55 M           | NA                                                                                                                               | None                    | NA                          | Viral Vector (Oxford-Astrazeneca), second | new                                                          | • Oedema<br>• Ascites                                                      | 7                              | Prednisolone                                                                              | Improved kidney function and proteinuria                                                      |
| Thappy 2021<br>Qatar       | case 1<br>43 M           | None                                                                                                                             | None                    | none                        | mRNA (Moderna), first                     | new                                                          | • Oedema<br>• Dyspnoea                                                     | 7                              | Furosemide, Amlodipine, Prednisolone                                                      | No oedema, raised serum albumin, reduced urine protein after 2 weeks                          |
| Abdulgayoom 2021<br>Qatar  | case 1<br>45 F           | Hypothyroidism, Atopic dermatitis, Heterozygous factor V mutation                                                                | None                    | NA                          | mRNA (Pfizer), first                      | new                                                          | • Oedema<br>• Abdominal distention<br>• Foamy urine<br>• Abdominal ascites | 4                              | Furosemide, Prednisolone, Vitamin D, Calcium, Pantoprazole, Trimethoprim/Sulfamethoxazole | NA                                                                                            |
| Klomjit 2021<br>USA        | case 1<br>83 M           | NA                                                                                                                               | None                    | NA                          | mRNA (Moderna), second                    | new                                                          | • AKI                                                                      | 28                             | High dose steroids                                                                        | Responded to treatment at 1 month follow-up                                                   |
|                            | case 2<br>67 F           | NA                                                                                                                               | NA                      | NA                          | mRNA (Moderna), second                    | relapse                                                      | • Oedema                                                                   | 21                             | High dose steroids, Rituximab                                                             | Responded to treatment at 2-month follow-up                                                   |
| Lim 2021<br>Korea          | case 1<br>51 M           | None                                                                                                                             | None                    | NA                          | Viral Vector (Janssen), first             | new                                                          | • Oedema<br>• Reduced urination<br>• Weight gain                           | 7                              | Furosemide, Methylprednisolone                                                            | Decreased serum creatinine, increased serum albumin after 7 days                              |
| Salem 2021<br>USA          | case 1<br>33 F           | None                                                                                                                             | MCD                     | NA                          | mRNA (Moderna), second                    | relapse                                                      | • Oedema<br>• Headache<br>• Vomiting<br>• Hypertension                     | 21                             | NA                                                                                        | NA                                                                                            |
|                            | case 2<br>41 F           | Asthma                                                                                                                           | None                    | NA                          | mRNA (Pfizer), second                     | new                                                          | • Fever<br>• Oedema<br>• Weight gain<br>• Hypertension                     | 5                              | NA                                                                                        | NA                                                                                            |
|                            | case 3<br>34 F           | None                                                                                                                             | MCD                     | NA                          | mRNA (Pfizer), second                     | relapse                                                      | • Oedema<br>• Abdominal pain                                               | 28                             | NA                                                                                        | NA                                                                                            |
| Morlidge 2021<br>UK        | case 1<br>30 M           | None                                                                                                                             | MCD                     | NA                          | Viral Vector (Oxford-Astrazeneca), first  | relapse                                                      | • Headache<br>• Frothy urine                                               | 2                              | Prednisolone                                                                              | Complete remission after 10 days treatment                                                    |
|                            | case 2<br>40 F           | None                                                                                                                             | MCD                     | NA                          | Viral Vector (Oxford-Astrazeneca), first  | relapse                                                      | • Headache<br>• Frothy urine<br>• Oedema                                   | 1                              | Prednisolone increased                                                                    | Complete remission within 2 weeks                                                             |
| Özkan 2022<br>Turkey       | case 1<br>33 F           | None                                                                                                                             | MCD                     | NA                          | inactive SARS-CoV-2, second               | relapse                                                      | • Foamy urine<br>• Oedema                                                  | 14                             | Methylprednisolone                                                                        | NA                                                                                            |
| Kervella 2021<br>France    | case 1<br>34 F           | None                                                                                                                             | MCD                     | NA                          | mRNA (Pfizer), first                      | relapse                                                      | • Oedema                                                                   | 10                             | Increased corticosteroid dose                                                             | Complete remission after second dose relapse                                                  |
| Chandra 2022<br>USA        | case 1<br>23 F           | None                                                                                                                             | None                    | NA                          | mRNA (Moderna), second                    | new                                                          | • Oedema<br>• Elevated blood pressure                                      | 7                              | Corticosteroids                                                                           | Complete remission after 4 weeks                                                              |
|                            | case 2<br>74 M           | Hypertension                                                                                                                     | None                    | NA                          | mRNA (Pfizer), second                     | new                                                          | • Oedema<br>• Weight gain                                                  | 2                              | Supportive therapy                                                                        | Complete remission after ~6 weeks                                                             |
|                            | case 3<br>72 F           | Hypertension, Obesity, Dyslipidaemia                                                                                             | None                    | None                        | Viral Vector (Oxford-AstraZeneca), First  | new                                                          | • Oedema<br>• Dyspnoea<br>• Fatigue                                        | 14                             | Prednisolone                                                                              | Complete remission of proteinuria and improved creatinine and albumin after 2 weeks treatment |
|                            | case 4<br>71 M           | Acute myeloid leukaemia, Allogeneic hematopoietic stem cell transplantation, Glucocorticoid-induced diabetes, Mild GVHD in liver | MCD (GVHD)              | NA                          | mRNA (Moderna), second                    | relapse                                                      | • Foamy and dark urine<br>• Oedema<br>• Abdominal bloating                 | 7                              | Prednisolone, Rituximab, Loop diuretic                                                    | Complete remission after 7 months                                                             |

(Continued)

Table 1. (Continued)

| Author, Year, Country | Case number, Age, Gender | Comorbidities | Previous glomerulopathy       | Previous COVID-19 infection | COVID-19 vaccine type and dose            | New onset/ relapse of minimal change disease post vaccination | Main presenting symptoms | Days for the onset of symptoms | Treatment                              | Outcome                              |
|-----------------------|--------------------------|---------------|-------------------------------|-----------------------------|-------------------------------------------|---------------------------------------------------------------|--------------------------|--------------------------------|----------------------------------------|--------------------------------------|
| Hummel 2022<br>France | case 1<br>38 M           | NA            | NA                            | NA                          | Viral Vector (Oxford-AstraZeneca), first  | relapse                                                       | NA                       | 14                             | Corticosteroids, Mycophenolate Mofetil | Complete remission after 1 month     |
|                       | case 3<br>74 M           | NA            | NA                            | NA                          | mRNA (Pfizer), first                      | relapse                                                       | NA                       | 21                             | Corticosteroids, Calcineurin inhibitor | Complete remission after 3 months    |
|                       | case 4<br>46 F           | NA            | NA                            | NA                          | mRNA (Pfizer), first                      | relapse                                                       | NA                       | 11                             | Corticosteroids, Calcineurin inhibitor | Complete remission after 1 month     |
|                       | case 5<br>23 M           | NA            | NA                            | NA                          | mRNA (Pfizer), first                      | relapse                                                       | NA                       | 21                             | Corticosteroids, Obinutuzumab          | Complete remission after 1 month     |
|                       | case 6<br>30 F           | NA            | NA                            | NA                          | mRNA (Pfizer), second                     | relapse                                                       | NA                       | 6                              | Corticosteroids, Rituximab             | Complete remission after 1 month     |
|                       | case 7<br>36 F           | NA            | NA                            | NA                          | mRNA (Pfizer), first                      | relapse                                                       | NA                       | 10                             | Corticosteroids, Rituximab             | Complete remission after 1 month     |
|                       | case 8<br>41 F           | NA            | NA                            | NA                          | mRNA (Pfizer), first                      | relapse                                                       | NA                       | 30                             | Corticosteroids, Calcineurin inhibitor | Complete remission after 1 month     |
|                       | case 9<br>16 M           | NA            | NA                            | NA                          | mRNA (Pfizer), first                      | relapse                                                       | NA                       | 15                             | Corticosteroids                        | Complete remission after 1 month     |
|                       | case 10<br>19 M          | NA            | NA                            | NA                          | mRNA (Pfizer), first                      | relapse                                                       | NA                       | 21                             | Corticosteroids                        | Complete remission after 1 month     |
|                       | case 11<br>48 M          | NA            | NA                            | NA                          | mRNA (Moderna), first                     | relapse                                                       | NA                       | 7                              | Corticosteroids, Mycophenolate mofetil | Complete remission after 1 month     |
|                       | case 12<br>40 M          | NA            | NA                            | NA                          | mRNA (Pfizer), first                      | relapse                                                       | NA                       | 7                              | Corticosteroids                        | Complete remission after 1 month     |
|                       | case 14<br>83 M          | NA            | NA                            | NA                          | Viral Vector (Oxford-AstraZeneca), second | relapse                                                       | NA                       | 20                             | Corticosteroids                        | Complete remission after 3 months    |
|                       | case 15<br>53 F          | NA            | NA                            | NA                          | mRNA (Pfizer), first                      | relapse                                                       | NA                       | 26                             | Corticosteroids                        | Complete remission after 1 month     |
|                       | case 16<br>25 M          | NA            | NA                            | NA                          | mRNA (Pfizer), first                      | relapse                                                       | NA8                      | 21                             | Corticosteroids, Mycophenolate mofetil | Complete remission after 1 month     |
|                       | case 17<br>19 M          | NA            | NA                            | NA                          | mRNA (Pfizer), second                     | relapse                                                       | NA                       | 25                             | Corticosteroids                        | Complete remission after 1 month     |
|                       | case 18<br>15 M          | NA            | NA                            | NA                          | mRNA (Pfizer), first                      | relapse                                                       | NA                       | 28                             | Corticosteroids                        | Complete remission after 1 month     |
|                       | case 19<br>31 M          | NA            | NA                            | NA                          | mRNA (Pfizer), first                      | relapse                                                       | NA                       | 21                             | Corticosteroids                        | Complete remission after 1 month     |
|                       | case 20<br>21 M          | NA            | NA                            | NA                          | mRNA (Pfizer), second                     | relapse                                                       | NA                       | 20                             | Corticosteroids                        | Complete remission after 3 months    |
|                       | case 21<br>42 M          | NA            | NA                            | NA                          | Viral Vector (Oxford-AstraZeneca), first  | relapse                                                       | NA                       | 11                             | Corticosteroids                        | Complete remission after 3 months    |
|                       | case 22<br>72 M          | NA            | NA                            | NA                          | mRNA (Pfizer), third                      | relapse                                                       | NA                       | 7                              | Corticosteroids, Mycophenolate mofetil | NA                                   |
|                       | case 23<br>18 F          | NA            | NA                            | NA                          | mRNA (Pfizer), first                      | relapse                                                       | NA                       | 14                             | Corticosteroids, Mycophenolate mofetil | Complete remission after 1 month     |
|                       | case 24<br>16 F          | NA            | NA                            | NA                          | mRNA (Moderna), second                    | relapse                                                       | NA                       | 1                              | Corticosteroids                        | Complete remission after 1 month     |
|                       | case 25<br>72 M          | NA            | NA                            | NA                          | mRNA (Pfizer), third                      | relapse                                                       | NA                       | 2                              | Corticosteroids                        | NA                                   |
| Güngör 2022<br>Turkey | case 1<br>17 F           | No            | Idiopathic nephrotic syndrome | NA                          | modRNA, second                            | relapse                                                       | • Oedema                 | 19                             | Corticosteroids                        | Remission after 2 weeks of treatment |
|                       | case 2<br>17.5 F         | No            | Idiopathic nephrotic syndrome | NA                          | NA, second                                | relapse                                                       | • Oedema                 | 12                             | Corticosteroids                        | Remission after 2 weeks of treatment |

(Continued)

Table 1. (Continued)

| Author, Year, Country       | Case number, Age, Gender | Comorbidities                                                                        | Previous glomerulopathy       | Previous COVID-19 infection | COVID-19 vaccine type and dose           | New onset/ relapse of minimal change disease post vaccination | Main presenting symptoms                                              | Days for the onset of symptoms | Treatment                                                                                   | Outcome                                                              |
|-----------------------------|--------------------------|--------------------------------------------------------------------------------------|-------------------------------|-----------------------------|------------------------------------------|---------------------------------------------------------------|-----------------------------------------------------------------------|--------------------------------|---------------------------------------------------------------------------------------------|----------------------------------------------------------------------|
| Fenoglio 2022 Italy         | case 5<br>36 M           | NA                                                                                   | No                            | NA                          | mRNA (Pfizer), second                    | new                                                           | • Urinary abnormalities                                               | 82                             | Rituximab                                                                                   | NA                                                                   |
|                             | case 7<br>82 M           | NA                                                                                   | No                            | NA                          | mRNA (Moderna), second                   | new                                                           | • Renal failure<br>• Nephrotic syndrome                               | 79                             | Glucocorticoids                                                                             | NA                                                                   |
|                             | case 8<br>54 F           | NA                                                                                   | No                            | NA                          | mRNA (Moderna), second                   | new                                                           | • Nephrotic syndrome                                                  | 62                             | Glucocorticoids                                                                             | NA                                                                   |
|                             | case 12<br>42 F          | NA                                                                                   | No                            | NA                          | mRNA (Pfizer), second                    | new                                                           | • Renal failure<br>• Nephrotic syndrome                               | 88                             | MC                                                                                          | NA                                                                   |
|                             | case 16<br>20 M          | NA                                                                                   | No                            | NA                          | mRNA (Pfizer), first                     | new                                                           | • Nephrotic syndrome                                                  | 46                             | Rituximab                                                                                   | NA                                                                   |
| Lim 2022 Korea              | case 2<br>52 M           | No                                                                                   | No                            | NA                          | Viral Vector (Janssen), first            | new                                                           | • Oedema<br>• Nephrotic syndrome<br>• Weight gain                     | 7                              | Prednisolone                                                                                | Complete response at 31 weeks                                        |
| Dormann 2021 Germany        | case 1<br>78 M           | Arterial hypertension, Coronary heart disease, Hyperlipoproteinemia, COPD, Allergies | No                            | none                        | mRNA (Pfizer), first                     | new                                                           | • Oedema<br>• Weight gain                                             | 4                              | Diuretics                                                                                   | Relapse after second dose<br>(see row below)                         |
|                             | case 1 (2)<br>78 M       | (See row above)                                                                      | (See row above)               | (See row above)             | second                                   | relapse                                                       | • Oedema<br>• Weight gain<br>• Pleural effusion                       | 14                             | Prednisolone, Diuretics, Anticoagulants                                                     | Partial remission, reduced proteinuria and weight loss after 3 weeks |
|                             | case 2<br>31 F           | Lipedema                                                                             | No                            | none                        | Viral Vector (Janssen), first            | new                                                           | • Oedema<br>• Foamy urine<br>• Syncope with orthostatic dysregulation | 0                              | Prednisolone, Antibiotics, Immunglobulin, Rituximab, Anticoagulation, Diuretics             | Complete remission with mild hyperlipoproteinemia at day 52          |
| Anupama 2021 India          | case 1<br>19 F           | NA                                                                                   | No                            | NA                          | Viral Vector (Oxford-AstraZeneca), first | new                                                           | • Oedema                                                              | 8                              | Prednisolone                                                                                | Clinical and biochemical remission                                   |
| Schwotzer 2021 Switzerland  | case 1<br>22 M           | No                                                                                   | MCD                           | NA                          | mRNA (Pfizer), NA                        | relapse                                                       | • Chills and low-grade fever<br>• Proteinuria                         | 2                              | Prednisolone, Tacrolimus                                                                    | Remission after 17 days treatment                                    |
| Hong 2022 Taiwan            | case 1<br>51 M           | No                                                                                   | No                            | NA                          | mRNA (Moderna), second                   | new                                                           | • Oedema<br>• Foamy urine                                             | 3                              | Prednisolone, Angiotensin 2 receptor blocker                                                | Complete remission at 10 weeks treatment                             |
| Timmermans 2022 Netherlands | case 1<br>64 F           | NA                                                                                   | No                            | none                        | Viral Vector (Oxford-AstraZeneca), first | new                                                           | • Oedema                                                              | 7                              | Prednisolone                                                                                | Complete remission after 4 months                                    |
|                             | case 2<br>34 M           | NA                                                                                   | No                            | none                        | mRNA (Pfizer), second                    | new                                                           | NA                                                                    | 28                             | No                                                                                          | NA                                                                   |
|                             | case 3<br>74 M           | NA                                                                                   | No                            | none                        | mRNA (Pfizer), second                    | new                                                           | NA                                                                    | 42                             | Prednisolone                                                                                | NA                                                                   |
| Nakazawa 2022 Japan         | case 1<br>15 M           | No                                                                                   | No                            | yes                         | mRNA (Pfizer), first                     | new                                                           | • Oedema<br>• Weight gain                                             | 4                              | Prednisolone                                                                                | Complete remission at 12 days of treatment                           |
| Arias 2022 Spain            | case 1<br>28 F           | No                                                                                   | Idiopathic nephrotic syndrome | yes                         | Viral Vector (Oxford-AstraZeneca), first | relapse                                                       | • Oedema                                                              | 2                              | Prednisolone, Atorvastatin, Antiplatelet therapy, Omeprazole, Trimethoprim-sulfamethoxazole | Negative proteinuria and no oedema after 4 weeks of treatment        |
| Haider 2022 Italy           | case 1<br>63 M           | No                                                                                   | MCD                           | NA                          | mRNA (Pfizer), booster                   | relapse                                                       | • Oedema<br>• Weight gain<br>• Elevated blood pressure                | < 7                            | Prednisolone                                                                                | Normal protein:creatinine ratio after 2 weeks treatment              |
| Fehr 2021 Switzerland       | case 1<br>65 M           | Collagenous colitis                                                                  | No                            | NA                          | mRNA (Moderna), first                    | new                                                           | • Nephrotic syndrome<br>• AKI                                         | 8                              | Dialysis, Immunosuppressive therapy                                                         | Complete remission after treatment                                   |

(Continued)

Table 1. (Continued)

| Author, Year, Country | Case number, Age, Gender | Comorbidities                                                    | Previous glomerulopathy | Previous COVID-19 infection | COVID-19 vaccine type and dose           | New onset/ relapse of minimal change disease post vaccination | Main presenting symptoms                                                                         | Days for the onset of symptoms | Treatment                                                  | Outcome                                                        |
|-----------------------|--------------------------|------------------------------------------------------------------|-------------------------|-----------------------------|------------------------------------------|---------------------------------------------------------------|--------------------------------------------------------------------------------------------------|--------------------------------|------------------------------------------------------------|----------------------------------------------------------------|
| Nagai 2022 Japan      | case 1<br>22 M           | No                                                               | No                      | NA                          | mRNA (Pfizer), first                     | new                                                           | • Oedema                                                                                         | 9                              | Heparin, Prednisolone, Furosemide                          | Clinical signs disappeared on 7 <sup>th</sup> day of treatment |
| Caza 2021 USA         | case 3<br>70 F           | NA                                                               | No                      | none                        | mRNA (Pfizer), second                    | new                                                           | • AKI<br>• Nephrotic syndrome                                                                    | < 7                            | Steroid therapy                                            | Recovery at 4 weeks                                            |
|                       | case 4<br>43 F           | NA                                                               | No                      | none                        | mRNA (Pfizer), second                    | new                                                           | • Nephrotic syndrome                                                                             | 14                             | Steroid therapy                                            | Recovery at 4 weeks                                            |
|                       | case 5<br>79 M           | NA                                                               | No                      | none                        | mRNA (NA), first                         | new                                                           | • AKI<br>• Nephrotic syndrome                                                                    | < 14                           | Steroid therapy                                            | Recovery at 4 weeks                                            |
|                       | case 6<br>72 M           | NA                                                               | No                      | none                        | mRNA (Moderna), second                   | new                                                           | Nephrotic syndrome                                                                               | 7                              | Steroid therapy, ACEi                                      | Recovery at 2 weeks                                            |
|                       | case 7<br>47 F           | NA                                                               | No                      | none                        | mRNA (Pfizer), second                    | new                                                           | • AKI<br>• Nephrotic syndrome                                                                    | < 14                           | Dialysis, Steroid therapy, ACEi                            | No recovery at 4 weeks                                         |
|                       | case 8<br>23 M           | NA                                                               | No                      | none                        | Viral Vector (Oxford-AstraZeneca), first | new                                                           | • AKI<br>• Nephrotic syndrome                                                                    | 14                             | Steroid therapy, Dialysis                                  | Recovery at 3 weeks                                            |
|                       | case 9<br>45 F           | NA                                                               | No                      | none                        | mRNA (Moderna), first                    | new                                                           | • Nephrotic syndrome                                                                             | < 14                           | Steroid therapy                                            | NA                                                             |
| Fornara 2022 Italy    | case 4<br>66 F           | Hypertension<br>TIA                                              | No                      | NA                          | mRNA (Pfizer), second                    | new                                                           | NA                                                                                               | 160                            | Oral steroids                                              | Partial remission after 56 days                                |
| Leclerc 2021 Canada   | case 1<br>71 M           | Dyslipidaemia                                                    | No                      | NA                          | Viral Vector (Oxford-AstraZeneca), first | new                                                           | • Oedema<br>• Elevated blood pressure<br>• AKI                                                   | 1                              | Methylprednisolone, Haemodialysis                          | Improvement after 30 days treatment                            |
| Mancianti 2021 Italy  | case 1<br>39 M           | No                                                               | MCD                     | none in the weeks prior     | mRNA (Pfizer), first                     | relapse                                                       | • Oedema<br>• Fatigue<br>• AKI                                                                   | 3                              | Prednisolone                                               | Complete remission after 4 weeks treatment                     |
| Holzworth 2021 USA    | case 1<br>63 F           | Hypertension,<br>Tobacco dependence                              | No                      | NA                          | mRNA (Moderna), first                    | new                                                           | • Oedema<br>• Dyspnoea<br>• Fatigue<br>• Frothy urine<br>• Elevated blood pressure<br>• Mild AKI | less than 7 days               | Methylprednisolone, Prednisolone, Valsartan, Loop diuretic | NA                                                             |
| Komaba 2021 Japan     | case 1<br>60s M          | No                                                               | MCD                     | NA                          | mRNA (Pfizer), first                     | relapse                                                       | • Frothy urine                                                                                   | 8                              | Prednisolone, Cyclosporine                                 | Proteinuria resolved within 2 weeks treatment                  |
| D'Agati 2021 USA      | case 1<br>77 M           | Type 2 diabetes mellitus,<br>Coronary artery disease,<br>Obesity | No                      | NA                          | mRNA (Pfizer), first                     | new                                                           | • Oedema<br>• Weight gain<br>• Elevated blood pressure<br>• Proteinuria                          | 7                              | Methylprednisolone, Prednisolone, Furosemide, Bumetanide   | No improvement after 3 weeks treatment                         |
| Maas 2021 Netherlands | case 1<br>80s M          | Venous thromboembolism                                           | No                      | NA                          | mRNA (Pfizer), first                     | new                                                           | • Oedema<br>• Weight gain                                                                        | 7                              | Prednisolone                                               | Improvement after 10 days treatment                            |

ACEi: angiotensin converting enzyme inhibitor, AKI: acute kidney injury, F: female, GVHD: graft versus host disease, M: male, MCD: Minimal Change Disease, NA: not available

<https://doi.org/10.1371/journal.pone.0297568.t001>

achieved recovery or improved following treatment (19.1%, 18/94). Two people relapsed after treatment (2.1%, 2/94) and two cases (2.1%, 2/94) were reported as not recovered. In 15 cases (16%, 15/94) data about outcome was not provided.

### Quality of the studies

The mean quality score indicated that the studies reported on average 10 of the recommended 12 elements, defined by the guidelines. Ten studies had a perfect score of 12 while the second most common score was 11 (S2 Table).

## Discussion

The administration of COVID-19 vaccines has not been deemed as a causative factor for kidney disease. However, recent findings, primarily derived from case reports and case series, indicate that various kidney disorders such as Minimal Change Disease (MCD), IgA nephropathy, membranous glomerulopathy, and IgG4-related disease have been observed to initially manifest or relapse subsequent to SARS-CoV-2 vaccination. These observations suggest a potential link between COVID-19 vaccination and the occurrence or recurrence of MCD. In this study, we conducted a thorough screening of the existing literature to present a comprehensive summary of documented cases of MCD following SARS-CoV-2 vaccination. Our systematic review identified 46 relevant reports, involving a total of 93 patients, in which MCD was observed subsequent to the administration of various COVID-19 vaccines. In the majority of cases, symptoms began to emerge following the first vaccine dose, and clinical improvement was reported for most patients.

## Results in the context of the literature

MCD consists the most frequent cause of nephrotic syndrome in childhood and rarely affects adults. MCD generally presents with a sudden onset of symptoms and signs of nephrotic syndrome and requires histologic confirmation in adults. Its pathogenesis remains to be elucidated, however, evidence points towards T cell dysfunction being a major mechanism [66]. It has been previously proposed that a glomerular permeability factor is produced, attacks the glomerular filtration barrier and leads to the destruction of podocytes and subsequent proteinuria. It's most commonly idiopathic, but infections, medications, vaccinations, malignancies, and allergens are among the secondary etiologic factors [67]. Infections including syphilis, hepatitis C and tuberculosis, and vaccinations against hepatitis B, influenza, measles and rubella are established triggering factors for the relapse of primary glomerulonephritis, potentially with a similar mechanism involved in the development of MCD [68].

In animal models the prevalence of CD8+ suppressor T-cells and subsequent cytokine-induced injury has been observed in the active phase of MCD [60, 69]. This could provide a possible explanation for the aforementioned cases since the existent vaccinations against COVID-19 are known to strongly induce T-cell activation and this could lead to immune mediated podocyte damage. It's worth noting that during the vaccine-induced T-cell activation, interferon gamma and interleukin-2 (IL-2) are increased and IL-2 has been found to be raised in the acute phase and relapses of idiopathic nephrotic syndrome [22]. Direct podocyte injury could also be implicated in MCD in both COVID-19 infection and vaccination and interestingly ACE-2 is expressed in podocytes, however there is currently not adequate evidence to establish a causative mechanism. Moreover, similarities between vaccine adjuvants and human proteins could lead to immune cross-reactivity and drug-induced hypersensitivity reactions through molecular mimicry [70, 71].

Even though MCD most commonly presents during childhood, it has been reported mainly in adults following COVID-19 vaccination, however this is to be expected considering the high vaccination rates in these age groups. MCD symptomatology commenced within 3 weeks from the first dose in more than half of the patients, although a significant amount of people developed symptoms after the second dose, which could be associated to the amplitude of the immune response. Symptoms did not differ from those commonly reported in literature and glucocorticoids were chosen as first-line treatment in 91.5% of the cases. Concerns about potential interference of immunosuppressive agents such as rituximab in the vaccination efficacy has been raised, however, relevant treatment to achieve best clinical response should be prioritised over immunisation in these cases. Overall the vast majority responded to treatment and maintained positive outcomes.

## Strengths and limitations

Our study represents the first systematic review conducted on the relationship between COVID-19 vaccination and the occurrence or relapse of MCD. Our findings present a comprehensive overview of published reports with quality assessment of the included studies.

However, it is important to highlight certain limitations linked to our study. One major limitation stems from the low quality nature of the case reports and case series included in this review, which can impact the validity and generalizability of the conclusions. These studies are susceptible to potential biases including overinterpretation and selection bias. Consequently, while the reported findings are interesting, they may not necessarily provide an accurate representation of the true effect of COVID-19 vaccination in relation to renal dysfunction. Therefore, establishing causality requires insight from mechanistic studies and well-designed appropriately powered prospective studies.

## Conclusion

While the current COVID-19 vaccines are generally considered safe and the advantages of vaccination outweigh the potential occurrence of adverse events, it is possible for patients to develop mild to moderate side effects, including complications related to renal dysfunction. Minimal change disease is possibly a condition clinical doctors and other healthcare professionals may expect to see in patients receiving COVID-19 vaccines. Although this adverse event is uncommon, considering the limited published data and the absence of confirmed causality, increased clinical awareness is crucial for the early recognition and optimal management of these patients.

## Supporting information

**S1 Table. Laboratory results and imaging findings for the included cases.**  
(DOCX)

**S2 Table. Quality assessment of the included studies.**  
(DOCX)

**S1 Fig. Prisma checklist.**  
(DOC)

## Author Contributions

**Conceptualization:** Konstantinos S. Kechagias, Dimitra Stathi.

**Data curation:** Konstantinos S. Kechagias, Joshua D. Laleye, Jan Drmota, Georgios Kyrtsionis, Marina Zafeiri, Konstantinos Katsikas Triantafyllidis, Dimitra Stathi.

**Formal analysis:** Konstantinos S. Kechagias, Joshua D. Laleye, Jan Drmota, Georgios Kyrtsionis, Marina Zafeiri, Konstantinos Katsikas Triantafyllidis, Dimitra Stathi.

**Investigation:** Konstantinos S. Kechagias, Joshua D. Laleye, Jan Drmota, Georgios Kyrtsionis, Marina Zafeiri, Konstantinos Katsikas Triantafyllidis, Dimitra Stathi.

**Methodology:** Konstantinos S. Kechagias, Joshua D. Laleye, Jan Drmota, Georgios Geropoulos, Georgios Kyrtsionis, Marina Zafeiri, Konstantinos Katsikas Triantafyllidis, Dimitra Stathi.

**Project administration:** Konstantinos S. Kechagias, Joshua D. Laleye, Marina Zafeiri, Dimitra Stathi.

**Resources:** Konstantinos S. Kechagias, Georgios Geropoulos, Georgios Kyrtsonis, Marina Zafeiri, Konstantinos Katsikas Triantafyllidis, Dimitra Stathi.

**Software:** Konstantinos S. Kechagias, Dimitra Stathi.

**Supervision:** Konstantinos S. Kechagias, Marina Zafeiri, Konstantinos Katsikas Triantafyllidis, Dimitra Stathi.

**Validation:** Konstantinos S. Kechagias, Joshua D. Laleye, Jan Drmota, Georgios Geropoulos, Georgios Kyrtsonis, Marina Zafeiri, Konstantinos Katsikas Triantafyllidis, Dimitra Stathi.

**Visualization:** Konstantinos S. Kechagias, Georgios Geropoulos, Marina Zafeiri, Konstantinos Katsikas Triantafyllidis, Dimitra Stathi.

**Writing – original draft:** Konstantinos S. Kechagias, Joshua D. Laleye, Jan Drmota, Georgios Geropoulos, Georgios Kyrtsonis, Marina Zafeiri, Konstantinos Katsikas Triantafyllidis, Dimitra Stathi.

**Writing – review & editing:** Konstantinos S. Kechagias, Georgios Geropoulos, Dimitra Stathi.

## References

1. Lu H, Stratton CW, Tang YW. Outbreak of pneumonia of unknown etiology in Wuhan, China: The mystery and the miracle. *J Med Virol*. 2020; 92(4):401. <https://doi.org/10.1002/jmv.25678> PMID: 31950516
2. Yang X, Yu Y, Xu J, Shu H, Liu H, Wu Y, et al. Clinical course and outcomes of critically ill patients with SARS-CoV-2 pneumonia in Wuhan, China: a single-centered, retrospective, observational study. *The Lancet Respiratory Medicine*. 2020; 8(5):475–81. [https://doi.org/10.1016/S2213-2600\(20\)30079-5](https://doi.org/10.1016/S2213-2600(20)30079-5) PMID: 32105632
3. Delardas O, Kechagias KS, Pontikos PN, Giannos P. Socio-Economic Impacts and Challenges of the Coronavirus Pandemic (COVID-19): An Updated Review. *Sustainability*. 2022; 14(15):9699.
4. Kechagias K, Giannos P, Triantafyllidis K, Falagas M. Spotlight on early COVID-19 research productivity: a 1-year bibliometric analysis.
5. Patel N, Nicolae R, Geropoulos G, Mandal P, Christou CD, Gavala M, et al. Pneumomediastinum in the COVID-19 era: to drain or not to drain? *Monaldi Arch Chest Dis*. 2022. Epub 20220727. <https://doi.org/10.4081/monaldi.2022.2338> PMID: 35904103.
6. Loubet P, Wittkop L, Tartour E, Parfait B, Barrou B, Blay J-Y, et al. A French cohort for assessing COVID-19 vaccine responses in specific populations. *Nat Med*. 2021; 1–3.
7. Tanriover MD, Doğanay HL, Akova M, Güner HR, Azap A, Akhan S, et al. Efficacy and safety of an inactivated whole-virion SARS-CoV-2 vaccine (CoronaVac): interim results of a double-blind, randomised, placebo-controlled, phase 3 trial in Turkey. *The Lancet*. 2021; 398(10296):213–22. [https://doi.org/10.1016/S0140-6736\(21\)01429-X](https://doi.org/10.1016/S0140-6736(21)01429-X) PMID: 34246358
8. Mathieu E, Ritchie H, Ortiz-Ospina E, Roser M, Hasell J, Appel C, et al. A global database of COVID-19 vaccinations. *Nature human behaviour*. 2021; 5(7):947–53. <https://doi.org/10.1038/s41562-021-01122-8> PMID: 33972767
9. Livingston EH, Malani PN, Creech CB. The Johnson & Johnson Vaccine for COVID-19. *JAMA*. 2021; 325(15):1575–.
10. Mulligan MJ, Lyke KE, Kitchin N, Absalon J, Gurtman A, Lockhart S, et al. Phase I/II study of COVID-19 RNA vaccine BNT162b1 in adults. *Nature*. 2020; 586(7830):589–93.
11. Barrett JR, Belij-Rammerstorfer S, Dold C, Ewer KJ, Folegatti PM, Gilbride C, et al. Phase 1/2 trial of SARS-CoV-2 vaccine ChAdOx1 nCoV-19 with a booster dose induces multifunctional antibody responses. *Nat Med*. 2021; 27(2):279–88. <https://doi.org/10.1038/s41591-020-01179-4> PMID: 33335322
12. Anderson EJ, Rouphael NG, Widge AT, Jackson LA, Roberts PC, Makhene M, et al. Safety and immunogenicity of SARS-CoV-2 mRNA-1273 vaccine in older adults. *N Engl J Med*. 2020; 383(25):2427–38. <https://doi.org/10.1056/NEJMoa2028436> PMID: 32991794
13. Katsikas Triantafyllidis K, Giannos P, Mian IT, Kyrtsonis G, Kechagias KS. Varicella zoster virus reactivation following COVID-19 vaccination: a systematic review of case reports. *Vaccines*. 2021; 9(9):1013. <https://doi.org/10.3390/vaccines9091013> PMID: 34579250

14. Available from: <https://www.gov.uk/government/organisations/medicines-and-healthcare-products-regulatory-agency>.
15. Giannos P, Triantafyllidis KK, Geropoulos G, Kechagias KS. Persistent Hiccups as an Atypical Presentation of SARS-CoV-2 Infection: A Systematic Review of Case Reports. *Front Neurol*. 2022;13. <https://doi.org/10.3389/fneur.2022.819624> PMID: 35444608
16. Dias L, Soares-dos-Reis R, Meira J, Ferrão D, Soares PR, Pastor A, et al. Cerebral venous thrombosis after BNT162b2 mRNA SARS-CoV-2 vaccine. *J Stroke Cerebrovasc Dis*. 2021; 30(8):105906. <https://doi.org/10.1016/j.jstrokecerebrovasdis.2021.105906> PMID: 34111775
17. Bril F, Al Diffalha S, Dean M, Fettig DM. Autoimmune hepatitis developing after coronavirus disease 2019 (COVID-19) vaccine: causality or casualty? *J Hepatol*. 2021; 75(1):222–4. <https://doi.org/10.1016/j.jhep.2021.04.003> PMID: 33862041
18. Triantafyllidis KK, Giannos P, Stathi D, Kechagias KS. Graves 'disease following vaccination against SARS-CoV-2: A systematic review of the reported cases. *Front Endocrinol (Lausanne)*. 2022; 13:938001. <https://doi.org/10.3389/fendo.2022.938001> PMID: 36237182
19. Kelly WN, Arellano FM, Barnes J, Bergman U, Edwards IR, Fernandez AM, et al. Guidelines for submitting adverse event reports for publication. *Pharmacoepidemiol Drug Saf*. 2007; 16(5):581–7. <https://doi.org/10.1002/pds.1399> PMID: 17471601
20. Marampudi S, Beshai R, Banker G. Reactivation of minimal change disease after pfizer vaccine against COVID-19. *Journal of Osteopathic Medicine*. 2022; 122(10):499–501. <https://doi.org/10.1515/jom-2022-0064> PMID: 35700437
21. Pella E, Sarafidis PA, Alexandrou M-E, Stangou M, Nikolaidou C, Kosmidis D, et al. De novo Minimal Change Disease in an Adolescent after Pfizer-BioNTech COVID-19 Vaccination: A Case Report. *Case Reports in Nephrology and Dialysis*. 2022; 12:44–9. <https://doi.org/10.1159/000521981> PMID: 35611026
22. Alhosaini MN. A Case of Minimal Change Disease after SARS-CoV-2 Vaccination under the Age of 18. *Avicenna Journal of Medicine*. 2022; 12(01):031–3. <https://doi.org/10.1055/s-0042-1743209> PMID: 35586388
23. Mochizuki RI, Takahashi N, Ikenouchi K, Shoda W, Kuyama T, Takahashi D. A de novo case of minimal change disease following the first dose of the Moderna mRNA-1273 SARS-CoV-2 vaccine without relapse after the second dose. *CEN case reports*. 2022; 11(4):477–81. <https://doi.org/10.1007/s13730-022-00702-5> PMID: 35435622
24. Park HJ, An WS, Rha SH, Kim SE, Lee SM. Minimal change glomerulonephritis following the second dose of the Moderna COVID-19 vaccine. *QJM: An International Journal of Medicine*. 2022; 115(7):490–1. <https://doi.org/10.1093/qjmed/hcac094> PMID: 35380707
25. Hartley JL, Bailey N, Sharma A, Shawki H. Nephrotic syndrome with minimal change disease after the Pfizer-BioNTech COVID-19 vaccine: two cases. *BMJ Case Reports CP*. 2022; 15(3):e244638. <https://doi.org/10.1136/bcr-2021-244638> PMID: 35246429
26. Leong C-Y, Hong W-Z, Khatri P. Reactivation of minimal change disease and IgA nephropathy after COVID-19 vaccination. *Clinical kidney journal*. 2022; 15(3):569–70. <https://doi.org/10.1093/ckj/sfab241> PMID: 35198161
27. Tanaka F, Katayama K, Joh K, Tsujimoto K, Yamawaki M, Saiki R, et al. Minimal change disease with thrombotic microangiopathy following the Pfizer-BioNTech COVID-19 vaccine. *Clinical Kidney Journal*. 2022; 15(3):567–8. <https://doi.org/10.1093/ckj/sfab234> PMID: 35198160
28. Jongvilaikasem P, Rianthavorn P. Minimal change disease and acute interstitial nephritis following SARS-CoV-2 BNT162b2 vaccination. *Pediatr Nephrol*. 2022; 37(6):1419–21. <https://doi.org/10.1007/s00467-022-05470-z> PMID: 35132446
29. Marinaki S, Kolovou K, Liapis G, Skalioti C, Tsiakas S, Boletis I. De Novo Minimal Change Disease following Vaccination with the Pfizer/BioNTech SARS-CoV-2 Vaccine in a Living Kidney Donor. *Medicina*. 2021; 58(1):37. <https://doi.org/10.3390/medicina58010037> PMID: 35056345
30. Biradar V, Konnur A, Gang S, Hegde U, Rajapurkar M, Patel H, et al. Adult-onset nephrotic syndrome following coronavirus disease vaccination. *Clinical Kidney Journal*. 2021; 15(1):168–70. <https://doi.org/10.1093/ckj/sfab153> PMID: 35035948
31. Unver S, Haholu A, Yildirim S. Nephrotic syndrome and acute kidney injury following CoronaVac anti-SARS-CoV-2 vaccine. *Clinical Kidney Journal*. 2021; 14(12):2608–11. <https://doi.org/10.1093/ckj/sfab155> PMID: 34938535
32. Lebedev L, Sapojnikov M, Wechsler A, Varadi-Levi R, Zamir D, Tobar A, et al. Minimal change disease following the Pfizer-BioNTech COVID-19 vaccine. *Am J Kidney Dis*. 2021; 78(1):142–5. <https://doi.org/10.1053/j.ajkd.2021.03.010> PMID: 33839200

33. Hanna J, Ingram A, Shao T. Minimal change disease after first dose of Pfizer-BioNTech COVID-19 vaccine: a case report and review of minimal change disease related to COVID-19 vaccine. *Canadian Journal of Kidney Health and Disease*. 2021; 8:20543581211058271. <https://doi.org/10.1177/20543581211058271> PMID: 34804557
34. Baskaran K, Cohen AWS, Weerasinghe N, Vilayur E. Report of two cases of minimal change disease following vaccination for COVID-19. *Nephrology (Carlton, Vic)*. 2022; 27(1):111. <https://doi.org/10.1111/nep.13995> PMID: 34779088
35. Thappy S, Thalappil SR, Abbarh S, Al-Mashdali A, Akhtar M, Alkadi MM. Minimal change disease following the Moderna COVID-19 vaccine: first case report. *BMC Nephrol*. 2021; 22:1–4.
36. Abdulgayoom M, Albuni MK, Abdelmahmuod E, Murshed K, Eldeeb Y. Minimal change nephrotic syndrome four days after the administration of Pfizer-BioNTech COVID-19 vaccine—a new side effect or coincidence? *Clinical Case Reports*. 2021; 9(10). <https://doi.org/10.1002/ccr3.5003> PMID: 34721864
37. Klomjit N, Alexander MP, Fervenza FC, Zoghby Z, Garg A, Hogan MC, et al. COVID-19 vaccination and glomerulonephritis. *Kidney international reports*. 2021; 6(12):2969–78. <https://doi.org/10.1016/j.ekir.2021.09.008> PMID: 34632166
38. Lim J-H, Han M-H, Kim Y-J, Kim M-S, Jung H-Y, Choi J-Y, et al. New-onset nephrotic syndrome after Janssen COVID-19 vaccination: a case report and literature review. *J Korean Med Sci*. 2021; 36(30). <https://doi.org/10.3346/jkms.2021.36.e218> PMID: 34342187
39. Salem F, Rein JL, Yu M-W, Abramson M, Cravedi P, Chung M. Report of three cases of minimal change disease following the second dose of mRNA SARS-CoV-2 COVID-19 vaccine. *Kidney International Reports*. 2021; 6(9):2523–4. <https://doi.org/10.1016/j.ekir.2021.07.017> PMID: 34337193
40. Morlidge C, El-Kateb S, Jeevaratnam P, Thompson B. Relapse of minimal change disease following the AstraZeneca COVID-19 vaccine. *Kidney Int*. 2021; 100(2):459. <https://doi.org/10.1016/j.kint.2021.06.005> PMID: 34119512
41. Özkan G, Bayrakçı N, Karabağ S, Güzel EÇ, Ulusoy S. Relapse of minimal change disease after inactivated SARS-CoV-2 vaccination: case report. *Int Urol Nephrol*. 2022; 1–2. <https://doi.org/10.1007/s11255-021-02889-5> PMID: 34181144
42. Kervella D, Jacquemont L, Chapelet-Debout A, Deltombe C, Ville S. Minimal change disease relapse following SARS-CoV-2 mRNA vaccine. *Kidney Int*. 2021; 100(2):457–8. <https://doi.org/10.1016/j.kint.2021.04.033> PMID: 33964312
43. Chandra P, Roldao M, Drachenberg C, Santos P, Washida N, Clark A, et al. Minimal change disease and COVID-19 vaccination: Four cases and review of literature. *Clinical Nephrology Case Studies*. 2022; 10:54. <https://doi.org/10.5414/CNCS110924> PMID: 35923765
44. Hummel A, Oniszczyk J, Kervella D, Charbit M, Guerrot D, Testa A, et al. Idiopathic nephrotic syndrome relapse following COVID-19 vaccination: a series of 25 cases. *Clinical kidney journal*. 2022; 15(8):1574–82. <https://doi.org/10.1093/ckj/sfac134> PMID: 35979142
45. Güngör T, Yazılıtaş F, Kargın Çakıcı E, Karakaya D, Bülbül M. Relapse of Idiopathic Nephrotic Syndrome After SARS-CoV-2 Vaccination: Two Case Reports. *J Paediatr Child Health*. 2022; 58(5):939–40. <https://doi.org/10.1111/jpc.15977> PMID: 35416332
46. Fenoglio R, Lalloni S, Marchisio M, Oddone V, De Simone E, Del Vecchio G, et al. New onset biopsy-proven nephropathies after COVID vaccination. *Am J Nephrol*. 2022; 53(4):325–30. <https://doi.org/10.1159/000523962> PMID: 35354140
47. Lim J-H, Kim M-S, Kim Y-J, Han M-H, Jung H-Y, Choi J-Y, et al. New-onset kidney diseases after COVID-19 vaccination: a case series. *Vaccines*. 2022; 10(2):302. <https://doi.org/10.3390/vaccines10020302> PMID: 35214760
48. Dormann H, Knüppel-Ruppert A, Amann K, Erley C. Nephrotic syndrome after vaccination against COVID-19: three new cases from Germany. *Deutsches Ärzteblatt International*. 2021; 118(39):662. <https://doi.org/10.3238/arztebl.m2021.0330> PMID: 34919048
49. Anupama Y, Patel RG, Vankalakunti M. Nephrotic syndrome following ChAdOx1 nCoV-19 vaccine against SARS-CoV-2. *Kidney International Reports*. 2021; 6(8):2248. <https://doi.org/10.1016/j.ekir.2021.06.024> PMID: 34250318
50. Schwotzer N, Kissling S, Fakhouri F. Letter regarding “Minimal change disease relapse following SARS-CoV-2 mRNA vaccine”. *Kidney Int*. 2021; 100(2):458–9.
51. Hong L-Y, Lee C-H, Chiu I-J. De novo podocytopathy following moderna COVID-19 vaccine: A case report and racial disproportionality in adverse effect reports. *Frontiers in Medicine*. 2022; 9. <https://doi.org/10.3389/fmed.2022.844004> PMID: 36052319
52. Timmermans SA, Busch MH, Abdul-Hamid MA, Frenken LA, Aarnoudse A-J, van Paassen P. Primary podocytopathies after COVID-19 vaccination. *Kidney International Reports*. 2022; 7(4):892. <https://doi.org/10.1016/j.ekir.2021.12.023> PMID: 34977435

53. Nakazawa E, Uchimura T, Hirai Y, Togashi H, Oyama Y, Inaba A, et al. New-onset pediatric nephrotic syndrome following Pfizer-BioNTech SARS-CoV-2 vaccination: a case report and literature review. *CEN case reports*. 2022;1–5. <https://doi.org/10.1007/s13730-021-00656-0> PMID: 34782983
54. Arias C, De Pedro F, Caliva E, Farias B, Iotti A, Rubio D. Glomerulonephritis due to minimal change disease post COVID-19 vaccine AstraZeneca. *Revista De Nefrologia Dialisis Y Trasplante*. 2022;65–8.
55. Haider S, Corbin D, Uppal N. Minimal Change Disease Relapse After SARS-CoV-2 Booster Vaccine. *Am J Kidney Dis*. 2022:S88–S.
56. Fehr N, Berney-Meyer L, Hopfer H, R  z H. Minimal change disease (MCD) after Moderna COVID-19 vaccination. *Swiss Med Wkly*. 2021;35S–S.
57. Nagai K, Kageyama M, Iwase M, Ueda A. A young adult with nephrotic syndrome following COVID-19 vaccination. *CEN Case Reports*. 2022; 11(3):397–8. <https://doi.org/10.1007/s13730-021-00673-z> PMID: 34981422
58. Caza TN, Cassol CA, Messias N, Hannoudi A, Haun RS, Walker PD, et al. Glomerular disease in temporal association with SARS-CoV-2 vaccination: a series of 29 cases. *Kidney360*. 2021; 2(11):1770. <https://doi.org/10.34067/KID.0005372021> PMID: 35372991
59. Fornara L, Musetti C, Guglielmetti G, Cantaluppi V. De Novo Glomerulonephritides Following BNT162B2 COVID-19 Vaccine: A Case Series. *Nephrology, dialysis, transplantation: official publication of the European Dialysis and Transplant Association-European Renal Association*. 2022.
60. Leclerc S, Royal V, Lamarche C, Laurin L-P. Minimal change disease with severe acute kidney injury following the Oxford-AstraZeneca COVID-19 vaccine: a case report. *Am J Kidney Dis*. 2021; 78(4):607–10. <https://doi.org/10.1053/j.ajkd.2021.06.008> PMID: 34242687
61. Mancianti N, Guarnieri A, Tripodi S, Salvo DP, Garosi G. Minimal change disease following vaccination for SARS-CoV-2. *Journal of nephrology*. 2021; 34(4):1039–40. <https://doi.org/10.1007/s40620-021-01091-1> PMID: 34143368
62. Holzworth A, Couchot P, Cruz-Knight W, Brucculeri M. Minimal change disease following the Moderna mRNA-1273 SARS-CoV-2 vaccine. *Kidney Int*. 2021; 100(2):463–4. <https://doi.org/10.1016/j.kint.2021.05.007> PMID: 34048824
63. Komaba H, Wada T, Fukagawa M. Relapse of minimal change disease following the Pfizer-BioNTech COVID-19 vaccine. *Am J Kidney Dis*. 2021; 78(3):469–70. <https://doi.org/10.1053/j.ajkd.2021.05.006> PMID: 34023417
64. D'Agati VD, Kudose S, Bombardieri AS, Adamidis A, Tartini A. Minimal change disease and acute kidney injury following the Pfizer-BioNTech COVID-19 vaccine. *Kidney Int*. 2021; 100(2):461–3. <https://doi.org/10.1016/j.kint.2021.04.035> PMID: 34000278
65. Maas RJ, Gianotten S, van der Meijden WA. An additional case of minimal change disease following the Pfizer-BioNTech COVID-19 vaccine. *Am J Kidney Dis*. 2021; 78(2):312. <https://doi.org/10.1053/j.ajkd.2021.05.003> PMID: 33992727
66. Maas RJ, Deegens JK, Wetzels JF. Permeability factors in idiopathic nephrotic syndrome: historical perspectives and lessons for the future. *Nephrology Dialysis Transplantation*. 2014; 29(12):2207–16. <https://doi.org/10.1093/ndt/gfu355> PMID: 25416821
67. Glasscock RJ. Secondary minimal change disease. *Nephrology Dialysis Transplantation*. 2003; 18(suppl\_6):vi52–vi8. <https://doi.org/10.1093/ndt/gfg1060> PMID: 12953043
68. Patel C, Shah HH. Vaccine-associated kidney diseases: A narrative review of the literature. *Saudi J Kidney Dis Transpl*. 2019; 30(5):1002–9. <https://doi.org/10.4103/1319-2442.270254> PMID: 31696837
69. Berre LL, Herva C, Buzelin F, Usal C, Souillou J-P, Dantal J. Renal macrophage activation and Th2 polarization precedes the development of nephrotic syndrome in Buffalo/Mna rats. *Kidney Int*. 2005; 68(5):2079–90. <https://doi.org/10.1111/j.1523-1755.2005.00664.x> PMID: 16221207
70. Segal Y, Shoenfeld Y. Vaccine-induced autoimmunity: the role of molecular mimicry and immune cross-reaction. *Cell Mol Immunol*. 2018; 15(6):586–94. <https://doi.org/10.1038/cmi.2017.151> PMID: 29503439
71. Zhang J, Cao J, Ye Q. Renal Side Effects of COVID-19 Vaccination. *Vaccines*. 2022; 10(11):1783. <https://doi.org/10.3390/vaccines10111783> PMID: 36366292
